# Supplementary material
Source: ML conference proceedings conference paper supplement (https://openreview.net/forum?id=D969j33VyX)
Supplement: supplementary_material [file attachment]

# Supplementary Materials: SemGIR: Semantic-Guided Image Regeneration based method for AI-generated Image Detection and Attribution

Anonymous Authors

## 1 OVERVIEW

Our supplementary materials consist of three parts: the attribution experiment for VQDM, the precision metric of detection performance, and a visual comparison between the regeneration process of SemGIR and DIRE.

## 2 ATTRIBUTION EXPERIMENT FOR VQDM

In addition to attempting attribution for SDv1.5 and SDv2.1, we also attempt attribution for VQDM. The results are shown in Table 1.

From the table, it is evident that attribution for VQDM is more challenging compared to attribution for SDv1.5 and SDv2.1. However, we still achieved SOTA performance among numerous methods with the highest accuracy of 85.33%.

**Table 1: The attribution accuracy comparison between SemGIR-A and baselines. Among all detectors, the best result and the second-best result are denoted in boldface and underlined, respectively.**

| Attribution Method | VQDM          | SDV1.5        | SDV2.1        |
|--------------------|---------------|---------------|---------------|
| CNNSpot            | 0.7530        | 0.7599        | 0.8021        |
| FreDect            | 0.7918        | 0.7563        | 0.8332        |
| Fusing             | 0.7534        | 0.8674        | <u>0.9718</u> |
| GramNet            | 0.7776        | 0.8148        | 0.8054        |
| LGrad              | 0.7229        | 0.8133        | 0.8433        |
| LNP                | <u>0.8484</u> | 0.7387        | 0.9701        |
| DIRE               | 0.8288        | <b>0.9114</b> | 0.9020        |
| UnivFD             | 0.8000        | 0.7748        | 0.8040        |
| SemGIR-A           | <b>0.8533</b> | <u>0.9016</u> | <b>0.9801</b> |

## 3 PRECISION METRIC OF DETECTION

In the main text, we mentioned using accuracy and precision metrics to evaluate the performance of various detection methods. The reason for using these two metrics is that accuracy can measure the overall performance of the detection method, while precision can measure the accuracy of the model when predicting the positive class. Due to page limitations, we only present the accuracy metric in the main text, and we will list the precision metric in this section.

We list the performance evaluation of various detection methods on the original images in Table 2. Additionally, we also present the detection performance after applying JPEG compression with quality factors of 70, 80, and 90 to the images in Table 3, Table 4, and Table 5, respectively.

From the tables, it can be observed that our method not only achieves the highest accuracy and precision for detecting original images but also maintains remarkable robustness when faced with JPEG compression at different levels.

## 4 VISUALIZATION

Finally, in Figure 1, we present a visualization of the regeneration results of SemGIR and DIRE. Given an AI-generated image, SemGIR performs semantically guided image regeneration, which is a semantic-level image regeneration, while DIRE directly regenerates the image at the pixel level, thus failing to ensure semantic-level consistency. We obtain captions for the re-generated images through BLIP to support our point.

From Figure 1, it can be observed that our method ensures semantic consistency between the re-generated image and the original AI-generated image, while the image reconstructed using DIRE fails to guarantee this semantic consistency. This also validates our viewpoint: as semantic consistency is ensured between the original and regenerated images, it effectively removes the influence of the text prompt, leading to a more thorough decoupling.

Table 2: The detection performance comparison between SemGIR and baselines. Among all detectors, the best result and the second-best result are denoted in boldface and underlined, respectively.

| Generator  | Metrics | Detection Methods |         |               |         |               |               |               |               |               |
|------------|---------|-------------------|---------|---------------|---------|---------------|---------------|---------------|---------------|---------------|
|            |         | CNNSpot           | FreDect | Fusing        | GramNet | LGrad         | LNP           | DIRE          | UnivFD        | SemGIR        |
| SDv1.5     | Acc     | 0.5630            | 0.5250  | <u>0.9960</u> | 0.7950  | 0.8730        | <b>0.9980</b> | 0.7980        | 0.8840        | 0.9929        |
|            | Prec    | 0.9302            | 0.4649  | <u>0.9999</u> | 0.8652  | 0.9988        | <b>1.0000</b> | 0.9783        | 0.9371        | <b>1.0000</b> |
| SDv2.1     | Acc     | 0.7937            | 0.4850  | <u>0.9405</u> | 0.6680  | 0.8710        | <b>0.9985</b> | <u>0.9710</u> | 0.7960        | 0.9561        |
|            | Prec    | 0.6350            | 0.4508  | <u>0.9983</u> | 0.8090  | 0.9944        | <b>1.0000</b> | 0.9168        | 0.7414        | 0.9967        |
| Midjourney | Acc     | 0.5763            | 0.5145  | <u>0.7463</u> | 0.8136  | 0.9845        | <b>1.0000</b> | 0.9522        | 0.8327        | <u>0.9954</u> |
|            | Prec    | 0.5497            | 0.4572  | <u>0.9676</u> | 0.7299  | 0.9639        | <b>0.9999</b> | 0.9280        | 0.9001        | <u>0.9519</u> |
| ADM        | Acc     | 0.6735            | 0.5250  | <u>0.4990</u> | 0.4995  | <u>0.8205</u> | 0.4880        | 0.5130        | 0.6380        | <b>0.9960</b> |
|            | Prec    | 0.7561            | 0.5388  | <u>0.5755</u> | 0.5277  | 0.9486        | 0.4874        | <u>0.9578</u> | 0.8626        | <b>0.9920</b> |
| VQDM       | Acc     | 0.4980            | 0.5005  | <u>0.5220</u> | 0.6455  | <u>0.8725</u> | 0.7665        | 0.6320        | 0.8285        | <b>0.9970</b> |
|            | Prec    | 0.6234            | 0.4832  | <u>0.6450</u> | 0.6875  | 0.9306        | 0.8961        | <b>0.9978</b> | 0.9872        | <u>0.9950</u> |
| StyleGAN2  | Acc     | 0.6260            | 0.5080  | <u>0.9370</u> | 0.7235  | 0.5250        | 0.6345        | 0.5147        | 0.8970        | <b>0.9546</b> |
|            | Prec    | 0.9575            | 0.4900  | <b>0.9939</b> | 0.8249  | 0.9323        | 0.9105        | 0.7601        | <u>0.9599</u> | 0.9509        |
| Average    | Acc     | 0.6217            | 0.5096  | <u>0.7734</u> | 0.6908  | <u>0.8244</u> | 0.8142        | 0.7301        | 0.8127        | <b>0.9820</b> |
|            | Prec    | 0.7790            | 0.5040  | <u>0.7381</u> | 0.6800  | <u>0.9371</u> | 0.7646        | 0.9052        | 0.9366        | <b>0.9793</b> |

Table 3: The detection performance under JPEG70 compression comparison between SemGIR and baselines. Among all detectors, the best result and the second-best result are denoted in boldface and underlined, respectively.

| Generator  | Metrics | Detection Methods |         |               |         |               |               |        |               |               |
|------------|---------|-------------------|---------|---------------|---------|---------------|---------------|--------|---------------|---------------|
|            |         | CNNSpot           | FreDect | Fusing        | GramNet | LGrad         | LNP           | DIRE   | UnivFD        | SemGIR        |
| SDv1.5     | Acc     | 0.5635            | 0.5250  | <b>0.9960</b> | 0.7970  | 0.7440        | 0.8695        | 0.5540 | 0.9160        | 0.9940        |
|            | Prec    | 0.9517            | 0.4548  | <b>1.0000</b> | 0.8777  | 0.9956        | <u>0.9999</u> | 0.8335 | 0.9769        | <b>1.0000</b> |
| SDv2.1     | Acc     | 0.5475            | 0.4850  | <u>0.9650</u> | 0.6695  | 0.8330        | <b>0.9975</b> | 0.8395 | 0.827         | 0.9501        |
|            | Prec    | 0.8157            | 0.4631  | <u>0.9995</u> | 0.7460  | 0.9931        | <b>1.0000</b> | 0.9000 | 0.7412        | 0.9969        |
| Midjourney | Acc     | 0.6836            | 0.4981  | <u>0.4736</u> | 0.8590  | <u>0.9725</u> | <b>0.9985</b> | 0.9072 | 0.9018        | 0.8770        |
|            | Prec    | 0.6920            | 0.0584  | <u>0.8752</u> | 0.7156  | 0.9431        | <b>1.0000</b> | 0.4722 | 0.9510        | <u>0.9706</u> |
| ADM        | Acc     | 0.7020            | 0.5250  | <u>0.4990</u> | 0.4840  | <u>0.8336</u> | 0.4578        | 0.4766 | 0.6365        | <b>0.9970</b> |
|            | Prec    | 0.7598            | 0.5490  | <u>0.5760</u> | 0.5072  | <u>0.9036</u> | 0.4154        | 0.6983 | 0.8299        | <b>0.9960</b> |
| VQDM       | Acc     | 0.4850            | 0.5005  | <u>0.5270</u> | 0.6270  | <u>0.8647</u> | 0.5994        | 0.4766 | 0.8245        | <b>0.9980</b> |
|            | Prec    | 0.5409            | 0.4832  | <u>0.6405</u> | 0.6604  | 0.9270        | 0.6341        | 0.6466 | <u>0.9777</u> | <b>0.9970</b> |
| StyleGAN2  | Acc     | 0.6260            | 0.5095  | <u>0.9370</u> | 0.7235  | 0.5250        | 0.5050        | 0.5050 | 0.8970        | <b>0.9617</b> |
|            | Prec    | 0.9306            | 0.4902  | <b>0.9939</b> | 0.8292  | 0.8825        | 0.9468        | 0.7603 | <u>0.9599</u> | 0.9519        |
| Average    | Acc     | 0.6012            | 0.5071  | <u>0.7329</u> | 0.6933  | 0.7954        | 0.7379        | 0.6264 | <u>0.8338</u> | <b>0.9629</b> |
|            | prec    | 0.7817            | 0.4164  | <u>0.8475</u> | 0.7226  | <u>0.9408</u> | 0.8327        | 0.7184 | 0.9061        | <b>0.9854</b> |

Table 4: The detection performance under JPEG80 compression comparison between SemGIR and baselines. Among all detectors, the best result and the second-best result are denoted in boldface and underlined, respectively.

| Generator  | Metrics | Detection Methods |         |               |         |               |               |        |               |               |
|------------|---------|-------------------|---------|---------------|---------|---------------|---------------|--------|---------------|---------------|
|            |         | CNNSpot           | FreDect | Fusing        | GramNet | LGrad         | LNP           | DIRE   | UnivFD        | SemGIR        |
| SDv1.5     | Acc     | 0.5630            | 0.5250  | <b>0.9960</b> | 0.7940  | 0.7835        | 0.9575        | 0.5925 | 0.9105        | <u>0.9940</u> |
|            | Prec    | 0.9180            | 0.4615  | <b>1.0000</b> | 0.8733  | 0.9965        | <u>0.9999</u> | 0.8981 | 0.9712        | <b>1.0000</b> |
| SDv2.1     | Acc     | 0.5495            | 0.4850  | 0.9320        | 0.6680  | 0.8770        | <b>0.9985</b> | 0.8450 | 0.7820        | <u>0.9753</u> |
|            | Prec    | 0.7753            | 0.4484  | <u>0.9986</u> | 0.7386  | 0.9948        | <b>1.0000</b> | 0.9130 | 0.7486        | 0.9968        |
| Midjourney | Acc     | 0.5145            | 0.5063  | 0.5263        | 0.7772  | 0.9825        | <b>1.0000</b> | 0.9102 | 0.8638        | 0.9430        |
|            | Prec    | <b>0.4720</b>     | 0.0584  | 0.9152        | 0.7193  | 0.9576        | <b>1.0000</b> | 0.4657 | 0.9082        | <u>0.9429</u> |
| ADM        | Acc     | 0.6565            | 0.5250  | 0.4990        | 0.5025  | <u>0.8063</u> | 0.4610        | 0.4766 | 0.6330        | <b>0.9960</b> |
|            | Prec    | 0.7363            | 0.5326  | 0.5241        | 0.5305  | <u>0.8899</u> | 0.4487        | 0.6471 | 0.8128        | <b>0.9900</b> |
| VQDM       | Acc     | 0.5005            | 0.5005  | 0.5135        | 0.6530  | <u>0.8631</u> | 0.5642        | 0.4766 | 0.8255        | <b>0.9975</b> |
|            | Prec    | 0.6227            | 0.4784  | 0.6008        | 0.6859  | 0.9176        | 0.5720        | 0.5921 | <u>0.9805</u> | <b>0.9950</b> |
| StyleGAN2  | Acc     | 0.6260            | 0.5055  | <u>0.9370</u> | 0.7235  | 0.5250        | 0.5045        | 0.5095 | 0.8970        | <b>0.9551</b> |
|            | Prec    | 0.9354            | 0.4899  | <b>0.9723</b> | 0.8283  | 0.8878        | 0.9161        | 0.7686 | <u>0.9599</u> | 0.9570        |
| Average    | Acc     | 0.5683            | 0.5078  | 0.7339        | 0.6863  | 0.8062        | 0.7476        | 0.6350 | <u>0.8186</u> | <b>0.9768</b> |
|            | prec    | 0.7432            | 0.4115  | 0.8351        | 0.7293  | <u>0.9407</u> | 0.8227        | 0.7141 | 0.8968        | <b>0.9802</b> |

Table 5: The detection performance under JPEG90 compression comparison between SemGIR and baselines. Among all detectors, the best result and the second-best result are denoted in boldface and underlined, respectively.

| Generator  | Metrics | Detection Methods |         |               |         |               |               |        |               |               |
|------------|---------|-------------------|---------|---------------|---------|---------------|---------------|--------|---------------|---------------|
|            |         | CNNSpot           | FreDect | Fusing        | GramNet | LGrad         | LNP           | DIRE   | UnivFD        | SemGIR        |
| SDv1.5     | Acc     | 0.5630            | 0.5250  | <b>0.9960</b> | 0.7960  | 0.8545        | 0.9890        | 0.6775 | 0.9095        | 0.9940        |
|            | Prec    | 0.9314            | 0.4623  | <b>1.0000</b> | 0.8745  | 0.9985        | <u>0.9999</u> | 0.9506 | 0.9694        | <b>1.0000</b> |
| SDv2.1     | Acc     | 0.5520            | 0.4850  | <u>0.9560</u> | 0.6675  | 0.8750        | <b>0.9990</b> | 0.8475 | 0.7830        | 0.9516        |
|            | Prec    | 0.8000            | 0.4540  | 0.9988        | 0.7425  | 0.9946        | <b>1.0000</b> | 0.9148 | 0.7497        | <u>0.9989</u> |
| Midjourney | Acc     | 0.5363            | 0.5018  | 0.5263        | 0.8136  | <u>0.9785</u> | <b>1.0000</b> | 0.9072 | 0.8809        | 0.9375        |
|            | Prec    | 0.5012            | 0.0583  | 0.9318        | 0.7212  | <u>0.9601</u> | <b>1.0000</b> | 0.4151 | 0.9119        | 0.9429        |
| ADM        | Acc     | 0.6460            | 0.5250  | 0.4990        | 0.4920  | <u>0.8178</u> | 0.4684        | 0.4766 | 0.6375        | <b>0.9965</b> |
|            | Prec    | 0.6978            | 0.5420  | 0.5429        | 0.5184  | <u>0.9078</u> | 0.4929        | 0.6122 | 0.8329        | <b>0.9910</b> |
| VQDM       | Acc     | 0.4955            | 0.5005  | 0.5245        | 0.6450  | <u>0.8447</u> | 0.6810        | 0.4766 | 0.8285        | <b>0.9970</b> |
|            | Prec    | 0.6039            | 0.4828  | 0.6375        | 0.6745  | 0.9025        | 0.7154        | 0.6024 | <u>0.9827</u> | <b>0.9950</b> |
| StyleGAN2  | Acc     | 0.6260            | 0.5085  | <u>0.9370</u> | 0.7235  | 0.5250        | 0.5045        | 0.5065 | 0.8970        | <b>0.9551</b> |
|            | Prec    | 0.9407            | 0.4900  | <b>0.9801</b> | 0.8292  | 0.9032        | 0.9451        | 0.7919 | <u>0.9599</u> | 0.9500        |
| Average    | Acc     | 0.5698            | 0.5076  | 0.7398        | 0.6896  | 0.8159        | 0.7736        | 0.6486 | <u>0.8227</u> | <b>0.9719</b> |
|            | prec    | 0.7458            | 0.4149  | 0.8485        | 0.7267  | <u>0.9444</u> | 0.8588        | 0.7145 | 0.9010        | <b>0.9796</b> |

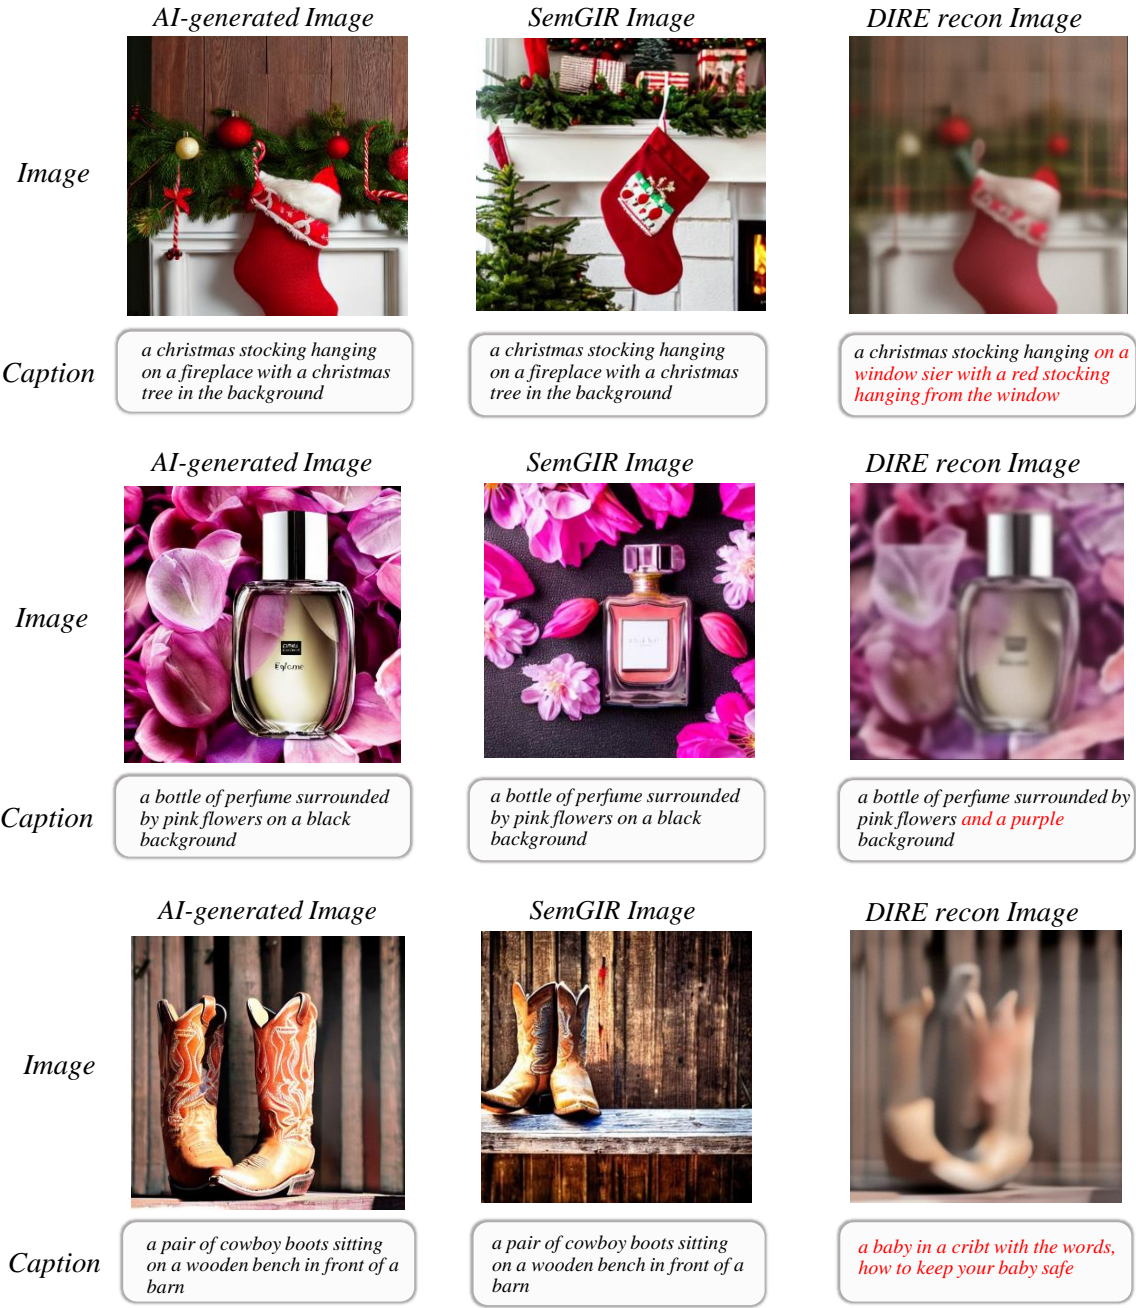

Figure 1: The visual comparison between the regeneration process of SemGIR and DIRE.
